# Supplementary material for: Effect of a Multispecialty Faculty Handoff Initiative on Safety Culture and Handoff Quality
Source: PubMed Central journal article supplement (PMC8970093; doi:10.1097/pq9.0000000000000539), 2022-03-30
Supplement: pqs-7-e539-s001.pdf [file pqs-7-e539-s001.pdf]

### I-PASS Handoff Observation Tool

Date: \_\_\_/\_\_\_/\_\_\_      Start Time: (HH:MM) \_\_\_\_\_      End Time: (HH:MM) \_\_\_\_\_

**Handoff Information:**

Type of Service: \_\_\_\_\_ -AND/OR- Unit: \_\_\_\_\_

**Title of Observer:**

|                                            |                 |    |    |    |     |        |  |
|--------------------------------------------|-----------------|----|----|----|-----|--------|--|
| Physician                                  | Fellow/Resident | RN | NP | PA | QIC | Other: |  |
| Observer ID: _____ (Needed for MOC credit) |                 |    |    |    |     |        |  |

**Title of Hand Off Giver:**

|                                                                                         |                 |    |    |    |     |        |  |
|-----------------------------------------------------------------------------------------|-----------------|----|----|----|-----|--------|--|
| Physician                                                                               | Fellow/Resident | RN | NP | PA | QIC | Other: |  |
| Giver ID: _____ (Please enter if your unit leader/chief will be tracking participation) |                 |    |    |    |     |        |  |

**Title of Hand off Receiver:**

|                                                                                            |                 |    |    |    |     |        |  |
|--------------------------------------------------------------------------------------------|-----------------|----|----|----|-----|--------|--|
| Physician                                                                                  | Fellow/Resident | RN | NP | PA | QIC | Other: |  |
| Receiver ID: _____ (Please enter if your unit leader/chief will be tracking participation) |                 |    |    |    |     |        |  |

Number of patients handed off that you observed: \_\_\_\_\_

**I-PASS Handoff Communication** During the Handoff report, please indicate the following:

| Observation of Person <b>GIVING</b> handoff                                                                                                     | Consistently | Not Consistently |
|-------------------------------------------------------------------------------------------------------------------------------------------------|--------------|------------------|
| <b>I</b> - Was the illness severity / Acuity of Patient(s) communicated?                                                                        |              |                  |
| <b>P</b> - Was there a patient summary provided?                                                                                                |              |                  |
| <b>A</b> - Were action items for the next shift communicated, or did the giver specify "No action items?"                                       |              |                  |
| <b>S</b> - Was situational awareness or contingency planning for the patient(s) communicated, or did the giver specify "No anticipated issues"? |              |                  |
| Observation of Person <b>RECEIVING</b> handoff                                                                                                  | Consistently | Not Consistently |
| <b>S</b> - Did the receiver verbalize a synthesis/summarize what was heard?                                                                     |              |                  |

Estimate the total number of interruptions that occurred during the handoff session? 0-2    3-5    >5

(Ex: Phone calls, Codes, Socialization, etc.)

**Questions/ Comments**

|                                                                           | Consistently | Not Consistently |
|---------------------------------------------------------------------------|--------------|------------------|
| Giver actively engaged with receiver to ensure understanding of patients  |              |                  |
| Giver appropriately prioritized key information, concerns, or actions     |              |                  |
| To-do list restricted to items that need to be accomplished on next shift |              |                  |
| Used high quality contingency plans with clear if/then format             |              |                  |

Share one positive **REINFORCING** piece of feedback based on your handoff observation

\_\_\_\_\_

\_\_\_\_\_

Share one **CORRECTIVE** piece of feedback based on your handoff observation

\_\_\_\_\_

\_\_\_\_\_
